# Supplementary material for: Single-Bud Expression Analysis of Bud Dormancy Factors in Peach
Source: MDPI journal article supplement (doi:10.3390/plants12142601), 2023-07-10
Supplement: s1 [file s1]

Table S1. Statistical differences in gene expression levels of various genes between samples using the Mann-Whitney U test. The upper table presents the p-values obtained using individual buds. The lower table shows the number of experiments with significant differences after pooling S3 samples using different p-values as cut-offs.

#### INDIVIDUAL BUDS

| Comparations | <i>PpeDAM1</i> | <i>PpeDAM3</i> | <i>PpeDAM4</i> | <i>PpeDAM5</i> | <i>PpeDAM6</i> | <i>PpeSAP1</i> | <i>TIP-like</i> | <i>TOR-like</i> | <i>SWEET15-like</i> | <i>AOC-like 1</i> | <i>AOC-like 2</i> | <i>LOX-like</i> | <i>PpeFT</i> |
|--------------|----------------|----------------|----------------|----------------|----------------|----------------|-----------------|-----------------|---------------------|-------------------|-------------------|-----------------|--------------|
| S1 vs S2     | 0,0115         | 0,8534         | 4,3E-05        | 0,0232         | 0,4359         | 0,0232         | 0,5288          | 0,0052          | 0,0015              | 0,0052            | 0,1431            | 0,0015          | 1,3E-04      |
| S1 vs S3     | 4,4E-05        | 1,3E-04        | 4,1E-06        | 9,5E-06        | 8,2E-07        | 1,5E-05        | 0,0127          | 0,0009          | 8,1E-05             | 0,0017            | 0,0590            | 0,5903          | 0,1178       |
| S1 vs S4     | 1,1E-05        | 0,0288         | 1,8E-04        | 1,1E-05        | 1,1E-05        | 1,1E-05        | 3,2E-04         | 0,1051          | 1,1E-05             | 7,6E-05           | 0,0089            | 1,1E-05         | 0,9118       |
| S2 vs S3     | 0,0084         | 1,2E-04        | 0,0098         | 6,5E-07        | 1,0E-06        | 0,0060         | 4,7E-05         | 0,7143          | 0,1704              | 0,6204            | 0,6824            | 1,0E-04         | 8,8E-05      |
| S2 vs S4     | 2,1E-04        | 0,0007         | 0,0046         | 1,1E-05        | 1,1E-05        | 0,0115         | 1,1E-05         | 0,0892          | 1,1E-05             | 4,9E-04           | 4,3E-05           | 1,1E-05         | 2,1E-04      |
| S3 vs S4     | 0,6719         | 1,2E-05        | 0,9362         | 1,7E-04        | 1,2E-06        | 0,3696         | 2,2E-04         | 0,0286          | 3,6E-07             | 9,7E-05           | 8,3E-06           | 7,6E-07         | 0,0636       |

|             |
|-------------|
| $p < 0,05$  |
| $p < 0,01$  |
| $p < 0,001$ |

#### ARTIFICIAL POOLED BUDS

| Comparations  | <i>PpeDAM1</i> | <i>PpeDAM3</i> | <i>PpeDAM4</i> | <i>PpeDAM5</i> | <i>PpeDAM6</i> | <i>PpeSAP1</i> | <i>TIP-like</i> | <i>TOR-like</i> | <i>SWEET15-like</i> | <i>AOC-like 1</i> | <i>AOC-like 2</i> | <i>LOX-like</i> | <i>PpeFT</i> |
|---------------|----------------|----------------|----------------|----------------|----------------|----------------|-----------------|-----------------|---------------------|-------------------|-------------------|-----------------|--------------|
| S1 vs pool S3 | 999            | 1000           | 1000           | 1000           | 1000           | 1000           | 998             | 1000            | 1000                | 1000              | 0                 | 0               | 999          |
| S2 vs pool S3 | 979            | 1000           | 941            | 1000           | 1000           | 999            | 1000            | 0               | 973                 | 17                | 241               | 1000            | 1000         |
| pool S3 vs S4 | 958            | 1000           | 4              | 1000           | 1000           | 1              | 976             | 982             | 1000                | 997               | 989               | 1000            | 993          |

Table S2. Hartigan's test for assessing bimodality in S3 samples using the R package 'dipTest'. The p value associated to the Hartigan's test for each gene is shown.

| Genes               | Hartigans' dip test p-value |
|---------------------|-----------------------------|
| <i>PpeDAM1</i>      | 0.9908                      |
| <i>PpeDAM3</i>      | 0.8038                      |
| <i>PpeDAM4</i>      | 0.9612                      |
| <i>PpeDAM5</i>      | 0.8157                      |
| <i>PpeDAM6</i>      | 0.988                       |
| <i>PpeSAP1</i>      | 0.9902                      |
| <i>TIP-like</i>     | 0.9819                      |
| <i>TOR-like</i>     | 0.9461                      |
| <i>SWEET15-like</i> | 0.9868                      |
| <i>AOC-like 1</i>   | 0.9858                      |
| <i>AOC-like 2</i>   | 0.9686                      |
| <i>LOX-like</i>     | 0.9831                      |
| <i>PpeFT</i>        | 0.9228                      |

Table S3. Primers used in this study.

| Gene                | forward                    | reverse                     | Reference |
|---------------------|----------------------------|-----------------------------|-----------|
| <i>SAND-like</i>    | TCGTGGGTACCAGGAAAACGACAT   | CCTGCTAGCTTGTGTCATCTCCA     | [37]      |
| <i>PpeDAM1</i>      | GGGGACGATGAAAATGACGAGGGAG  | GTGGTGGAGGTAGCAGATTCAGAT    | [60]      |
| <i>PpeDAM3</i>      | ACCAGCTAAGGCAGACGATGA      | GAGGGAGAGAGACTGAGAGCA       | [60]      |
| <i>PpeDAM4</i>      | TGTGGCACTTGAGAAAAAGGGA     | CAGGTTACTTTCCCCAGGCCAC      | [60]      |
| <i>PpeDAM5</i>      | CCCCGAAACCCACGAACGAAGATG   | CAGCACTGTTGCAGGTGGTG        | [60]      |
| <i>PpeDAM6</i>      | CCAACAACCAGTTAAGGCAGAAGA   | GGAAGCCCCAGTTTGAGAGA        | [24]      |
| <i>PpeSAP1</i>      | ACACAGGCTTCCTCTACTCCATCTTT | GAACCCCTCATTCCGAGACATTATCAG | [37]      |
| <i>TIP-like</i>     | AGTTGTTGCTTGCTTGCTACTCAAG  | GCACCAACAATCAAACCAATTGCGA   | [37]      |
| <i>TOR-like</i>     | GCAGTACCAAAGAAGATTGGGCAGA  | GCAAAATACTCGCGCCCAACAAAT    | [37]      |
| <i>SWEET15-like</i> | TTCCAATCGGTGCCATATCTGGTAG  | GAAGAGCCCCACGTTTCATAAAACCA  | [60]      |
| <i>AOC-like 1</i>   | ACAAGATCTACTCTGGGGACTTGG   | AAGCTGTAGACTGCCTCGTACCTG    | This work |
| <i>AOC-like 2</i>   | GTTAATCTCTTGAAGACCTCGTC    | GAAGCTGTAAATAGCCTCATATCG    | This work |
| <i>LOX-like</i>     | CAGTGTCACGGTGACCACAA       | CGCTAACAAGCTCCAAAAGAAGTG    | This work |
| <i>PpeFT</i>        | GGAGGTTAACAATGGTTGCGAG     | TCCTTAAGGTTGGGGTCACTTG      | This work |
